# Supplementary material for: Navigated Transcranial Magnetic Stimulation Motor Mapping and Diffusion Tensor Imaging Tractography for Diencephalic Tumor in Pediatric Patients
Source: MDPI journal article supplement (doi:10.3390/brainsci13020234), 2023-01-30
Supplement: s1 [file s1]

Table S1 All patients's data

|                                           | Patient 1                                                                          | Patient 2                                                                           | Patient 3                                                             | Patient 4                                             |
|-------------------------------------------|------------------------------------------------------------------------------------|-------------------------------------------------------------------------------------|-----------------------------------------------------------------------|-------------------------------------------------------|
| <b><i>Preoperative data</i></b>           |                                                                                    |                                                                                     |                                                                       |                                                       |
| Sex                                       | F                                                                                  | F                                                                                   | F                                                                     | M                                                     |
| Age                                       | 12                                                                                 | 13                                                                                  | 11                                                                    | 9                                                     |
| Tumour location                           | Right thalamopeduncular                                                            | Right thalamopeduncular                                                             | Right thalamic                                                        | Left thalamic with temporomesial and frontal invasion |
| Tumour volume (cm <sup>3</sup> )          | 12.3                                                                               | 19.0                                                                                | 36.7                                                                  | 42.3                                                  |
| Clinical Presentation                     | Headache and vomiting                                                              | Left hemiparesis and VII deficit, hydrocephalus                                     | Headache and vomiting                                                 | Headache and vomiting                                 |
| Motor status MRC grade (UL/IL)            | M5/M5                                                                              | M3/M3                                                                               | M5/M5                                                                 | M5/M5                                                 |
| Length of Symotoms (months)               | 12                                                                                 | 7                                                                                   | 3                                                                     | 0.2                                                   |
| Antiseizure medications                   | None                                                                               | None                                                                                | None                                                                  | None                                                  |
| Other                                     | -                                                                                  | NF1                                                                                 | NF1                                                                   | -                                                     |
| <b><i>nTMS data</i></b>                   |                                                                                    |                                                                                     |                                                                       |                                                       |
| Duration of the session (min)             | 73                                                                                 | 102                                                                                 | 55                                                                    |                                                       |
| Adverse event                             | None                                                                               | None                                                                                | None                                                                  |                                                       |
| RMT upper limb                            | 43%                                                                                | 46%                                                                                 | 35%                                                                   |                                                       |
| RMT lower limb                            | 58%                                                                                | 60%                                                                                 | 58%                                                                   |                                                       |
| RMT mouth                                 | Not detected                                                                       | Not detected                                                                        | 45%                                                                   |                                                       |
| No. stimuli upper limb                    | 66                                                                                 | 71                                                                                  | 97                                                                    |                                                       |
| No. stimuli lower limb                    | 67                                                                                 | 75                                                                                  | 68                                                                    |                                                       |
| No. stimuli mouth                         | -                                                                                  | -                                                                                   | 48                                                                    |                                                       |
| No. stimuli evoking a MEP for upper limb  | 25                                                                                 | 27                                                                                  | 45                                                                    |                                                       |
| No. stimuli evoking a MEP for lower limb  | 15                                                                                 | 10                                                                                  | 38                                                                    |                                                       |
| No. stimuli evoking a MEP mouth           | -                                                                                  |                                                                                     | 10                                                                    |                                                       |
| <b><i>DTI tractography</i></b>            |                                                                                    |                                                                                     |                                                                       |                                                       |
| CST identification and localization       | Lateral displacement. Bundle for hand: anteriorly and bundle for foot: posteriorly | Anterior displacement of hand bundle, posterolateral displacement of the leg bundle | Medial displacement with bundle for mouth markedly shifted anteriorly |                                                       |
| FA                                        | Hand:0.13; foot: 0.16                                                              | Hand: 0.15; foot: 0.08                                                              | Hand: 0.23; foot: 0.24; mouth: 0.29                                   |                                                       |
| DTT (mm)                                  | 3                                                                                  | 3                                                                                   | 4                                                                     |                                                       |
| Fiber integrity                           | Displaced but intact                                                               | Displaced but intact                                                                | Displaced but intact                                                  |                                                       |
| <b><i>Intraoperative data</i></b>         |                                                                                    |                                                                                     |                                                                       |                                                       |
| Approach                                  | Trans-sylvian                                                                      | Trans-temporal                                                                      | Trans-temporal                                                        |                                                       |
| IONM                                      | Reduction > 50%                                                                    | Reduction > 50 %                                                                    | Unchanged                                                             |                                                       |
| Complications                             | None                                                                               | None                                                                                | None                                                                  |                                                       |
| Pathology                                 | Pilocytic Astrocytoma                                                              | Pilocytic Astrocytoma                                                               | Pilocytic Astrocytoma                                                 |                                                       |
| <b><i>Postoperative data</i></b>          |                                                                                    |                                                                                     |                                                                       |                                                       |
| Complications                             | MCA stroke                                                                         | None                                                                                | None                                                                  |                                                       |
| Residual tumour volume (cm <sup>3</sup> ) | 0.13 (1.1%)                                                                        | 0.75 (3.9%)                                                                         | 0                                                                     |                                                       |
| Motor status MRC (UL/IL)                  | M1/M3                                                                              | M2/M2                                                                               | M5/M5                                                                 |                                                       |
| Adjuvant therapy                          | None                                                                               | None                                                                                | None                                                                  |                                                       |
| Motor status MRC (UL/IL) at follow-up     | M5-/M5                                                                             | M4/M4                                                                               | M5/M5                                                                 |                                                       |

|                     |      |      |      |  |
|---------------------|------|------|------|--|
| Recurrency          | None | None | None |  |
| Length of follow-up | 20   | 16   | 12   |  |

F: female, M: male, MRC: motor research council, UL: upper limb, IL: inferior limb, RMT: resting motor threshold, MEP: motor evoked potential, DTI: diffusion tensor imaging, CST: corticospinal tract, FA: fractional anisotropy , DTT: distance tumour-tract, IONM: intraoperative neuromonitoring,
